# Supplementary material for: Characteristics of Abnormalities in Somatosensory Submodalities Observed in Residents Exposed to Methylmercury
Source: MDPI journal article supplement (doi:10.3390/toxics11121023), 2023-12-15
Supplement: s1 [file s1]

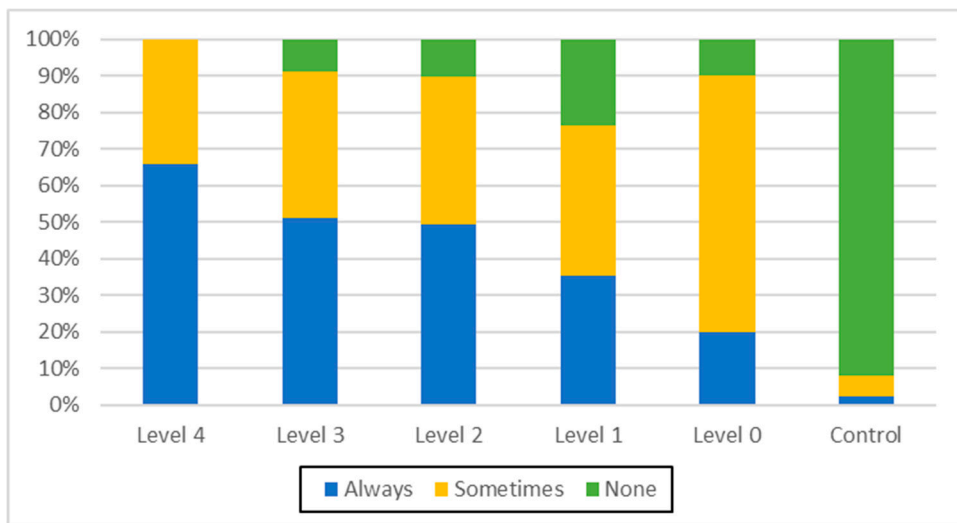

Figure S1. Prevalence of "Sensory numbness in both hands" (Q1) in each sensory disturbance level ( $\chi^2(10) = 227.8$ ,  $p=0.000$ )

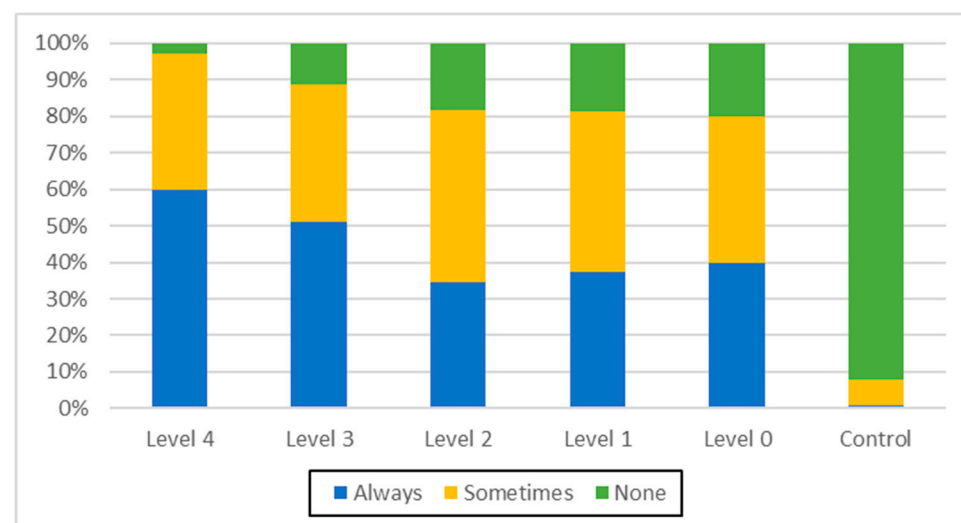

Figure S2. Prevalence of "Sensory numbness in both legs" (Q2) in each sensory disturbance level ( $\chi^2(10) = 200.8$ ,  $p=0.000$ )

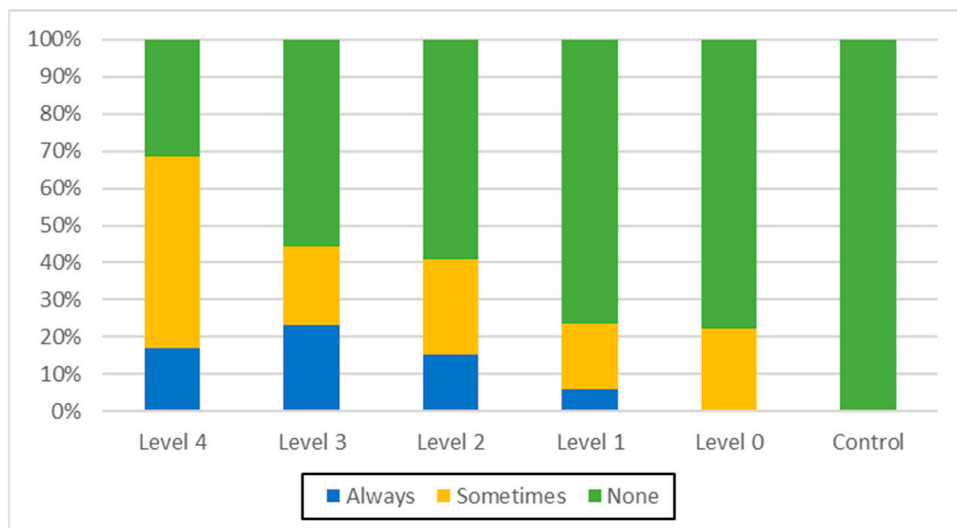

Figure S3. Prevalence of "No pain when burn or wounded" (Q5) in each sensory disturbance level ( $\chi^2(10) = 101.8$ ,  $p=0.000$ )

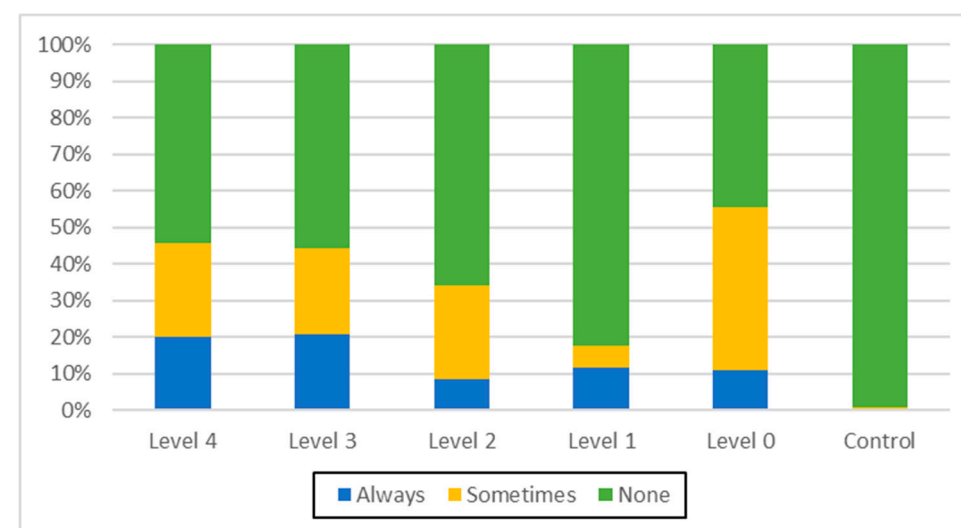

Figure S4. Prevalence of "Difficulty in judging the adequate temperature of bath water" (Q6) in each sensory disturbance level ( $\chi^2(10) = 74.8$ ,  $p=0.000$ )

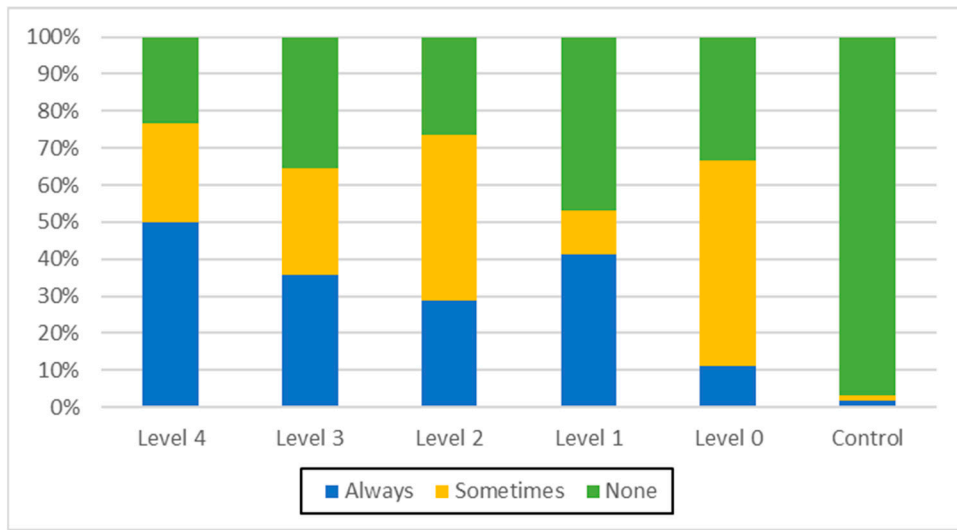

Figure S5. Prevalence of "Hanging a bag with elbow or shoulder instead of holding it in your hand" (Q7) in each sensory disturbance level ( $\chi^2(10) = 158.5$ ,  $p=0.000$ )

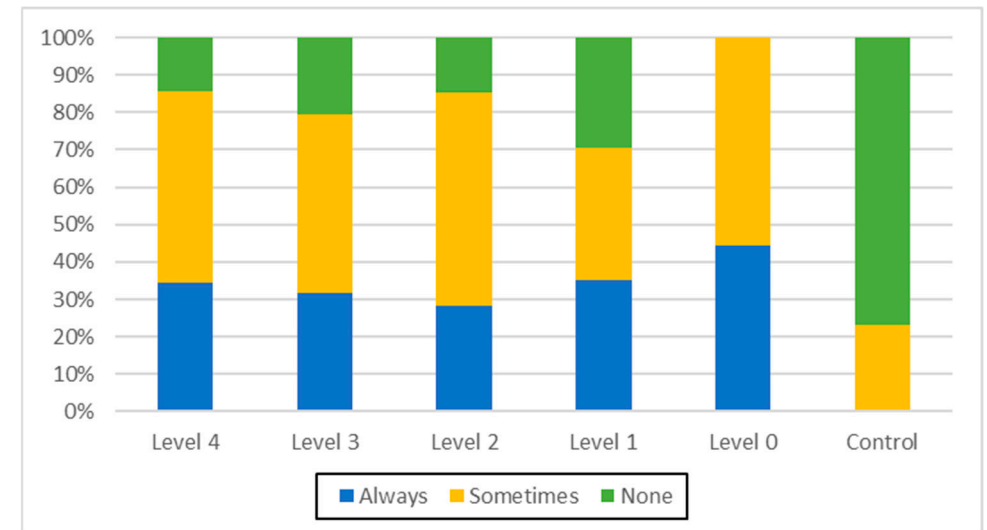

Figure S6. Prevalence of "Headache" (Q8) in each sensory disturbance level ( $\chi^2(10) = 128.2$ ,  $p=0.000$ )

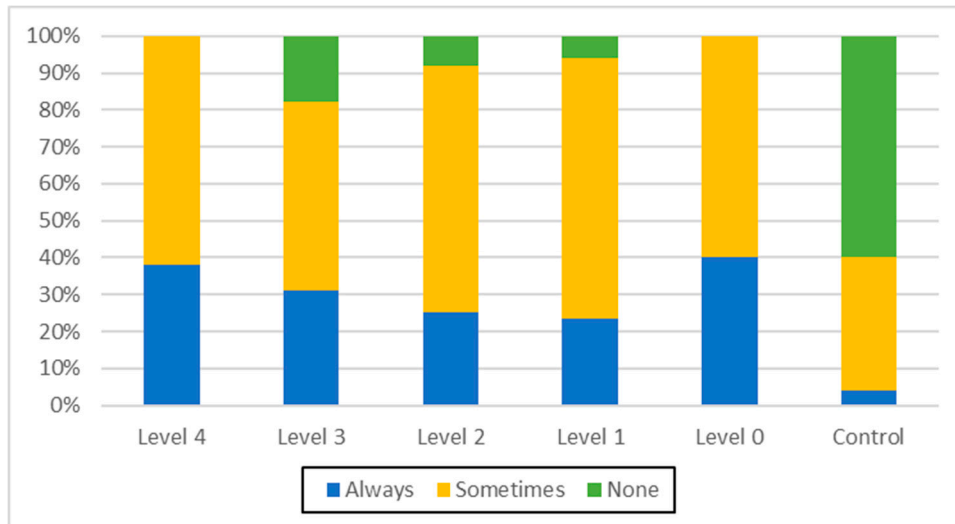

Figure S7. Prevalence of "Muscle cramps" (Q11) in each sensory disturbance level ( $\chi^2(10) = 113.5$ ,  $p=0.000$ )

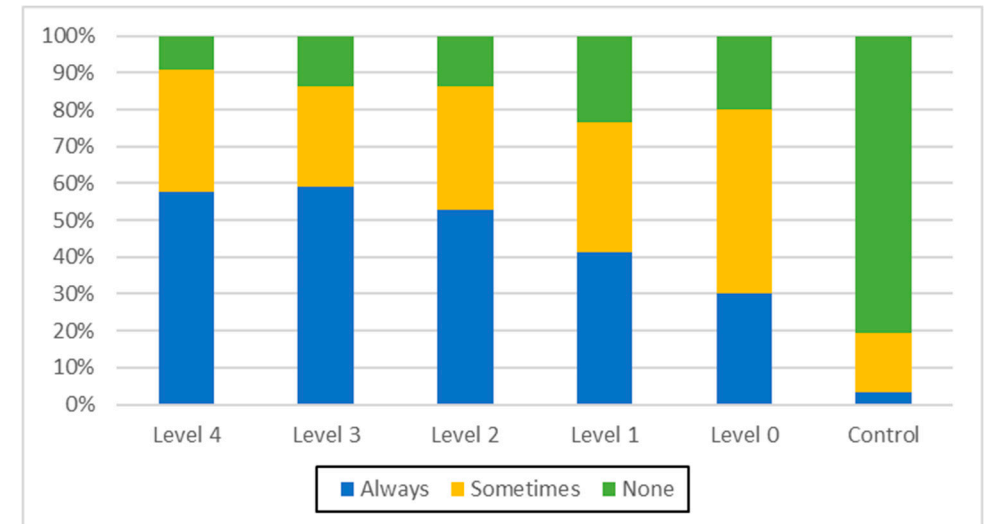

Figure S8. Prevalence of "Disturbed vision" (Q12) in each sensory disturbance level ( $\chi^2(10) = 152.7$ ,  $p=0.000$ )

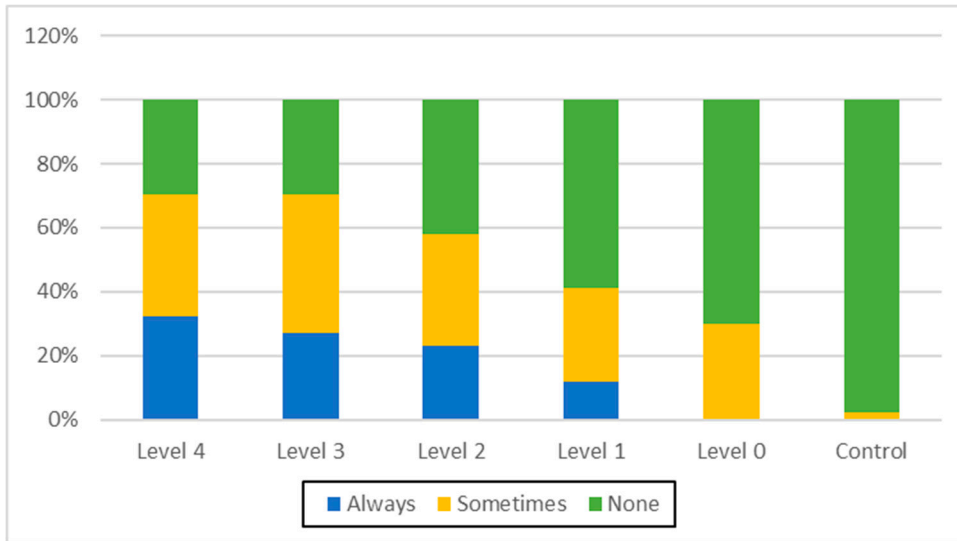

Figure S9. Prevalence of "Difficulty in recognizing a thing in your sight when you continue to stare it" (Q14) in each sensory disturbance level ( $\chi^2(10)=121.3$ ,  $p=0.000$ )

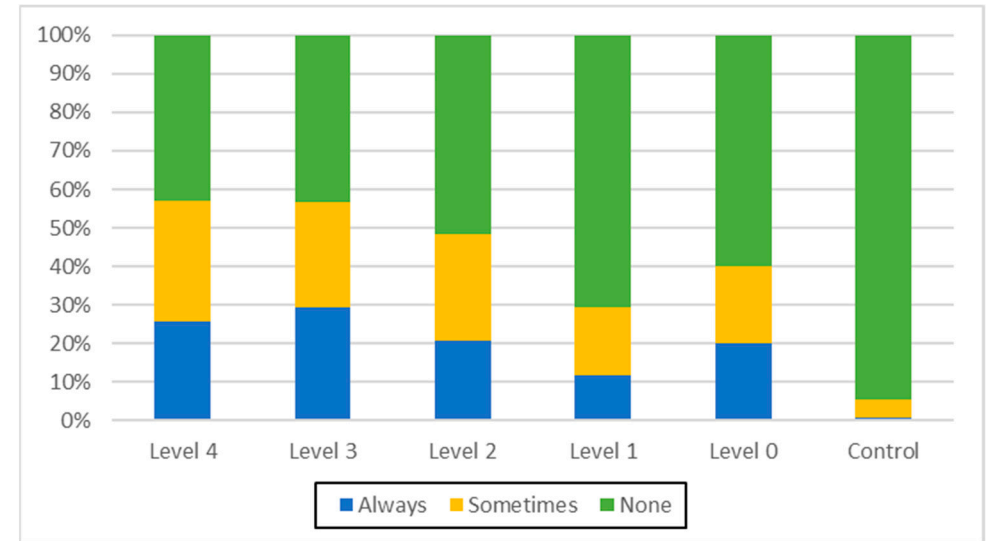

Figure S10. Prevalence of "Difficulty in smelling" (Q19) in each sensory disturbance level ( $\chi^2(10)=76.1$ ,  $p=0.000$ )

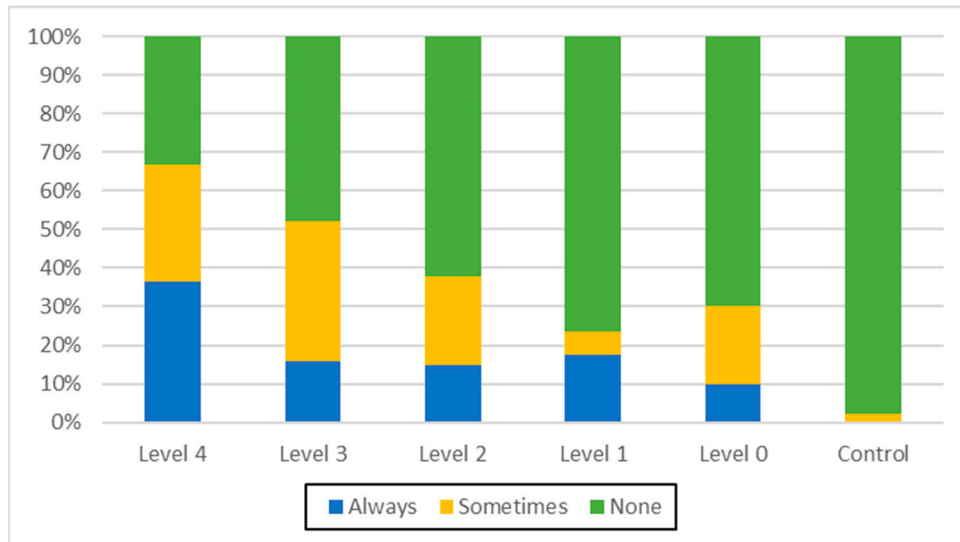

Figure S11. Prevalence of "Difficulty in tasting" (Q20) in each sensory disturbance level ( $\chi^2(10)=92.3$ ,  $p=0.000$ )

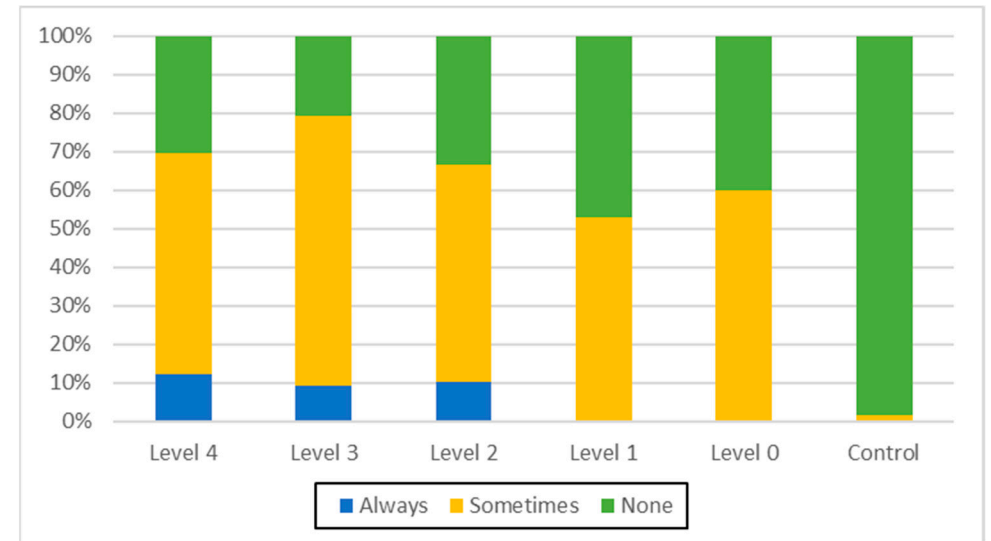

Figure S12. Prevalence of "Stumbling on flat ground" (Q22) in each sensory disturbance level ( $\chi^2(10)=149.3$ ,  $p=0.000$ )

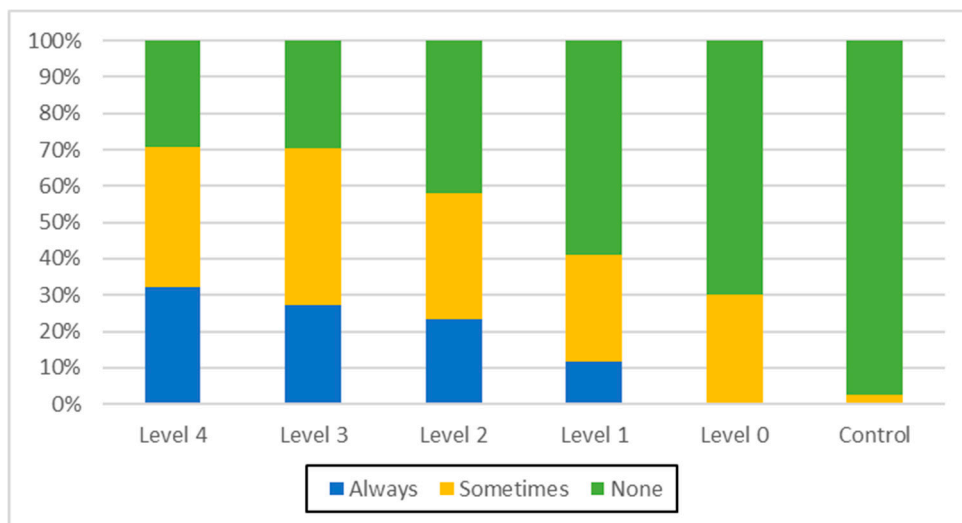

Figure S13. Prevalence of "Difficulty in wearing slippers" (Q23) in each sensory disturbance level ( $\chi^2(10)=165.7$ ,  $p=0.000$ )

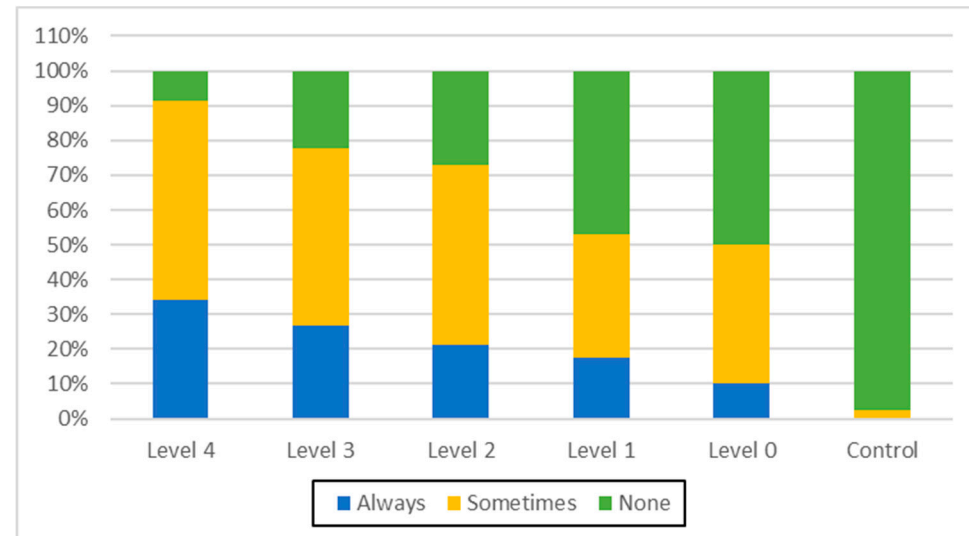

Figure S14. Prevalence of "Coming off your slippers or sandals while walking" (Q24) in each sensory disturbance level ( $\chi^2(10)=173.0$ ,  $p=0.000$ )

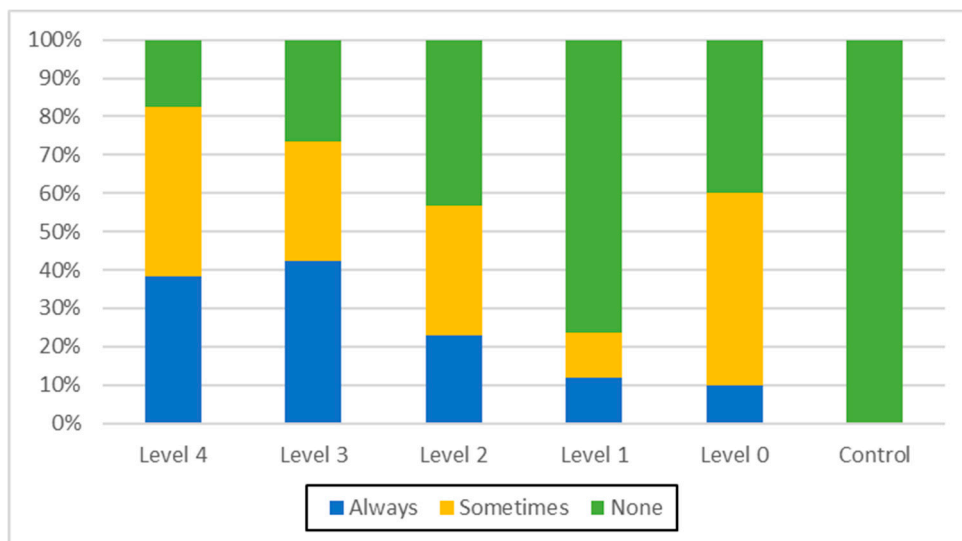

Figure S15. Prevalence of "Difficulty in buttoning" (Q26) in each sensory disturbance level ( $\chi^2(10)=155.4$ ,  $p=0.000$ )

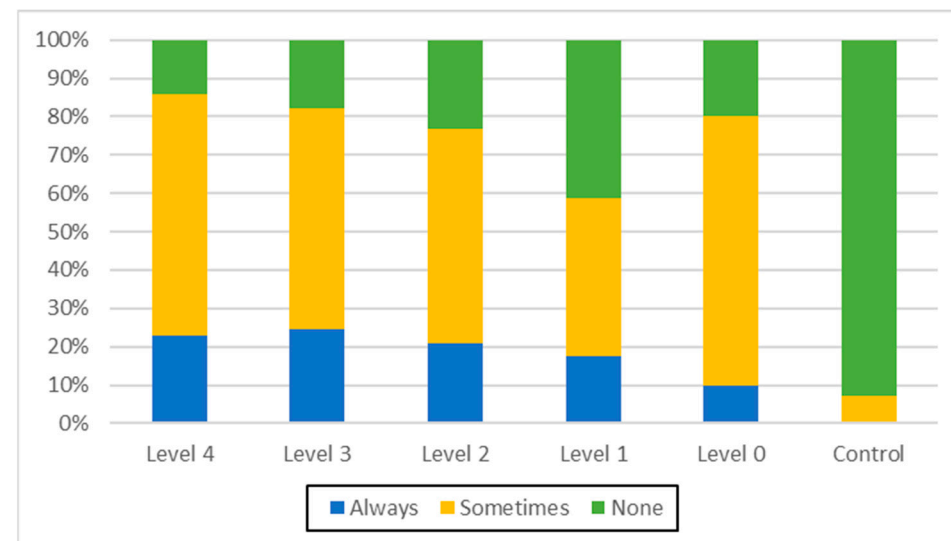

Figure S16. Prevalence of "Dropping things in the hand" (Q27) in each sensory disturbance level ( $\chi^2(10)=162.2$ ,  $p=0.000$ )

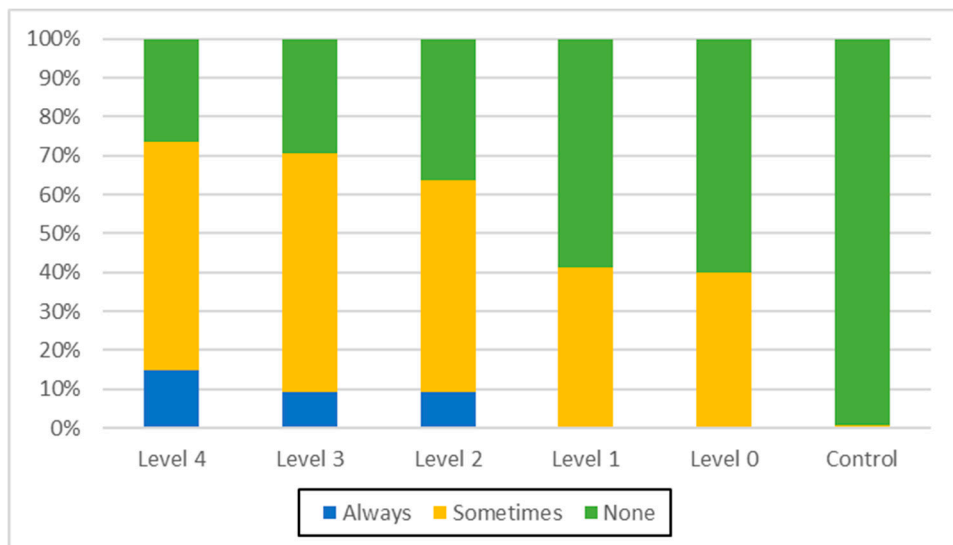

Figure S17. Prevalence of "Dropping chopsticks while eating" (Q28) in each sensory disturbance level ( $\chi^2(10) = 139.7$ ,  $p = 0.000$ )

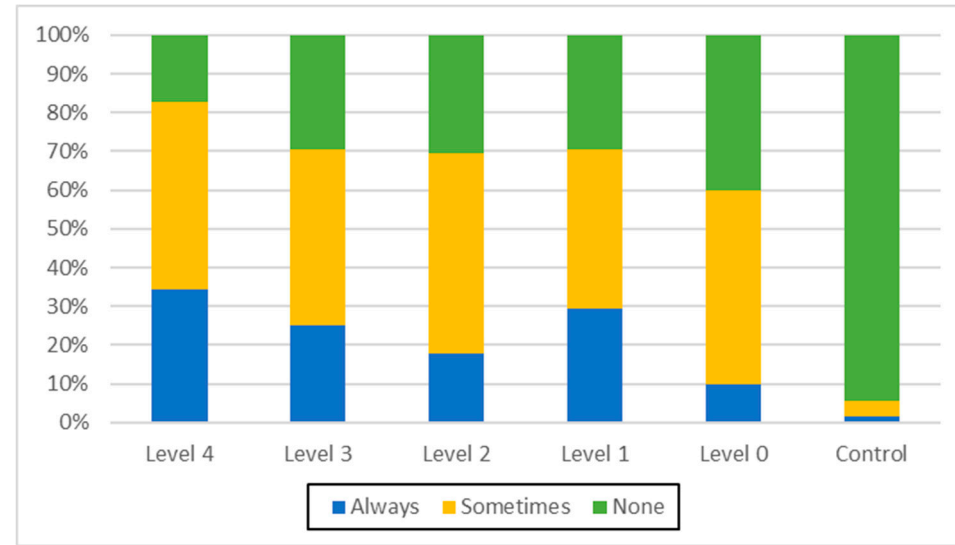

Figure S18. Prevalence of "Hand tremor while moving" (Q32) in each sensory disturbance level ( $\chi^2(10) = 142.5$ ,  $p = 0.000$ )

**Table S1.** Threshold of "minimal tactile sense" in each touch disturbance type by examination (Evaluator size =  $\log([\text{gram}]) + 4$ )

|                        | Lower lip         | Chest             | Index finger (R)  | Index finger (L)  | Great toe (R)     | Great toe (L)     |
|------------------------|-------------------|-------------------|-------------------|-------------------|-------------------|-------------------|
| General (V)            | 3.66±0.79 (n=14)  | 4.92±0.60 (n=14)  | 4.96±0.68 (n=14)  | 4.98±0.72 (n=14)  | 5.98±0.58 (n=14)  | 5.89±0.57 (n=14)  |
| General + 4 Limbs (IV) | 3.60±0.84 (n=21)  | 4.82±0.45 (n=21)  | 4.92±0.61 (n=21)  | 4.93±0.76 (n=21)  | 5.70±0.71 (n=21)  | 5.71±0.69 (n=21)  |
| 4 Limbs (III)          | 2.64±0.55 (n=120) | 4.17±0.48 (n=123) | 4.23±0.52 (n=122) | 4.20±0.58 (n=122) | 5.01±0.67 (n=122) | 5.03±0.68 (n=122) |
| 1-3 Limb(s) (II)       | 2.08±0.23 (n=17)  | 3.73±0.50 (n=18)  | 3.67±0.47 (n=18)  | 3.67±0.34 (n=18)  | 4.20±0.41 (n=18)  | 4.18±0.46 (n=18)  |
| None(I)                | 2.23±0.39 (n=13)  | 3.64±0.70 (n=13)  | 3.71±0.39 (n=14)  | 3.63±0.38 (n=14)  | 4.50±0.54 (n=14)  | 4.44±0.60 (n=14)  |
| Control                | 2.03±0.22 (n=185) | 2.82±0.58 (n=189) | 3.12±0.38 (n=189) | 3.04±0.35 (n=189) | 3.78±0.35 (n=189) | 3.81±0.40 (n=189) |

**Table S2.** Threshold of "vibration sense" in each touch disturbance type by examination (second)

|                        | Chest             | Wrist (R)         | Wrist (L)         | Ankle (R)         | Ankle (L)         |
|------------------------|-------------------|-------------------|-------------------|-------------------|-------------------|
| General (V)            | 7.21±3.23 (n=14)  | 6.92±4.10 (n=14)  | 6.92±3.75 (n=14)  | 4.78±2.39 (n=14)  | 4.57±2.17 (n=14)  |
| General + 4 Limbs (IV) | 7.86±3.05 (n=22)  | 6.54±3.06 (n=22)  | 6.86±3.32 (n=22)  | 4.13±2.53 (n=22)  | 4.18±2.55 (n=22)  |
| 4 Limbs (III)          | 9.87±3.04 (n=128) | 9.42±3.47 (n=128) | 9.76±3.83 (n=128) | 6.62±2.68 (n=128) | 6.73±3.15 (n=128) |
| 1-3 Limb(s) (II)       | 11.3±2.25 (n=18)  | 11.3±2.95 (n=18)  | 11.7±2.96 (n=18)  | 8.44±2.87 (n=18)  | 8.27±2.78 (n=18)  |
| None(I)                | 12±2.80 (n=14)    | 12.1±3.84 (n=14)  | 12.3±4.37 (n=14)  | 8.42±3.45 (n=14)  | 8.71±3.87 (n=14)  |
| Control                | 14.8±2.87 (n=196) | 16.8±3.08 (n=196) | 17.2±2.86 (n=196) | 13.7±3.55 (n=196) | 13.8±3.66 (n=196) |

**Table S3.** Threshold of "position sense" in each touch disturbance type by examination (mm)

|                        | Index finger (R Upper) | Index finger (R Lower) | Index finger (L Upper) | Index finger (L Lower) |
|------------------------|------------------------|------------------------|------------------------|------------------------|
| General (V)            | 22.8±21.3 (n=14)       | 22.1±23.2 (n=14)       | 26.0±26.3 (n=14)       | 23.2±21.3 (n=14)       |
| General + 4 Limbs (IV) | 22.5±28.1 (n=22)       | 22.9±27.3 (n=22)       | 23.6±29.2 (n=22)       | 23.4±26.7 (n=22)       |
| 4 Limbs (III)          | 8.56±5.51 (n=128)      | 8.61±5.31 (n=128)      | 8.30±5.19 (n=128)      | 8.96±5.88 (n=128)      |
| 1-3 Limb(s) (II)       | 5.55±1.61 (n=18)       | 5.55±1.61 (n=18)       | 5.55±1.61 (n=18)       | 5.83±1.91 (n=18)       |
| None(I)                | 6.42±2.34 (n=15)       | 5.71±1.81 (n=15)       | 6.42±2.34 (n=15)       | 6.07±2.12 (n=15)       |
| Control                | 5±0 (n=197)            | 5.11±0.75 (n=197)      | 5±0 (n=197)            | 5±0 (n=197)            |

**Table S3.** (Cont.)

|             | Great toe (R Upper) | Great toe (R Lower) | Great toe (L Upper) | Great toe (L Lower) |
|-------------|---------------------|---------------------|---------------------|---------------------|
| General (V) | 27.8±16.4 (n=14)    | 26.7±17.9 (n=14)    | 29.6±17.4 (n=14)    | 27.5±17.4 (n=14)    |

|                        |                   |                   |                   |                   |
|------------------------|-------------------|-------------------|-------------------|-------------------|
| General + 4 Limbs (IV) | 23.8±15.1 (n=22)  | 24.0±17.4 (n=22)  | 25.9±15.6 (n=22)  | 26.1±18.7 (n=22)  |
| 4 Limbs (III)          | 13.2±10.0 (n=128) | 13.1±9.61 (n=128) | 12.6±9.21 (n=128) | 13.5±9.96 (n=128) |
| 1-3 Limb(s) (II)       | 7.5±4.28 (n=18)   | 8.88±6.31 (n=18)  | 7.22±3.07 (n=18)  | 7.5±3.09 (n=18)   |
| None(I)                | 8.66±7.89 (n=15)  | 9±6.03 (n=15)     | 8±7.74 (n=15)     | 8.33±5.87 (n=15)  |
| Control                | 5.15±1.06 (n=197) | 5.03±0.43 (n=197) | 5.07±0.61 (n=197) | 5.03±0.43 (n=197) |

Table S4. Threshold of "" in each touch disturbance type by examination (degree)

|                        | Lower lip         | Index finger (R)  | Index finger (L)  |
|------------------------|-------------------|-------------------|-------------------|
| General (V)            | 31.3±12.8 (n=14)  | 35.8±9.16 (n=14)  | 36.7±8.06 (n=14)  |
| General + 4 Limbs (IV) | 17.6±13.3 (n=22)  | 28.2±13.7 (n=22)  | 29.9±12.8 (n=22)  |
| 4 Limbs (III)          | 9.29±10.1 (n=128) | 15.4±13.7 (n=128) | 16.4±14.5 (n=128) |
| 1-3 Limb(s) (II)       | 4.94±3.84 (n=18)  | 7.5±5.45 (n=18)   | 8.61±8.38 (n=18)  |
| None(I)                | 3.78±1.36 (n=15)  | 4.78±1.88 (n=15)  | 6.42±5.72 (n=15)  |
| Control                | 2.11±0.98 (n=197) | 2.82±1.20 (n=197) | 3.04±1.55 (n=197) |

Table S5. Threshold of visual field by Goldmann's perimeter in each touch disturbance type by examination (dB)

|                        | Right otolateral  | Right nasal       | Left otolateral   | Left nasal        |
|------------------------|-------------------|-------------------|-------------------|-------------------|
| General (V)            | 72.5±20.5 (n=12)  | 51.7±14.4 (n=12)  | 72.9±16.0 (n=12)  | 56.1±11.1 (n=12)  |
| General + 4 Limbs (IV) | 73.8±13.7 (n=20)  | 51.7±10.1 (n=20)  | 70.5±13.2 (n=20)  | 53.3±10.5 (n=20)  |
| 4 Limbs (III)          | 82.8±8.69 (n=119) | 57.4±9.33 (n=118) | 80.3±10.2 (n=119) | 59.0±7.62 (n=119) |
| 1-3 Limb(s) (II)       | 85.2±7.88 (n=18)  | 59.8±8.05 (n=18)  | 81.4±9.28 (n=17)  | 59.2±6.58 (n=17)  |
| None(I)                | 85.3±9.63 (n=14)  | 59.1±9.02 (n=14)  | 81.3±10.8 (n=13)  | 61.3±6.89 (n=13)  |

Table S6. Auditory acuity by audiometer in each touch disturbance type by examination

|             | Right ear        | Left ear         |
|-------------|------------------|------------------|
| General (V) | 33.9±12.6 (n=14) | 41.7±14.9 (n=14) |

---

|                        |                   |                   |
|------------------------|-------------------|-------------------|
| General + 4 Limbs (IV) | 46.2±26.2 (n=22)  | 45.6±26.7 (n=22)  |
| 4 Limbs (III)          | 30.8±15.8 (n=128) | 31.3±18.1 (n=128) |
| 1-3 Limb(s) (II)       | 20.5±10.8 (n=18)  | 21.7±11.0 (n=18)  |
| None(I)                | 25.7±12.6 (n=15)  | 27.4±14.9 (n=15)  |

---



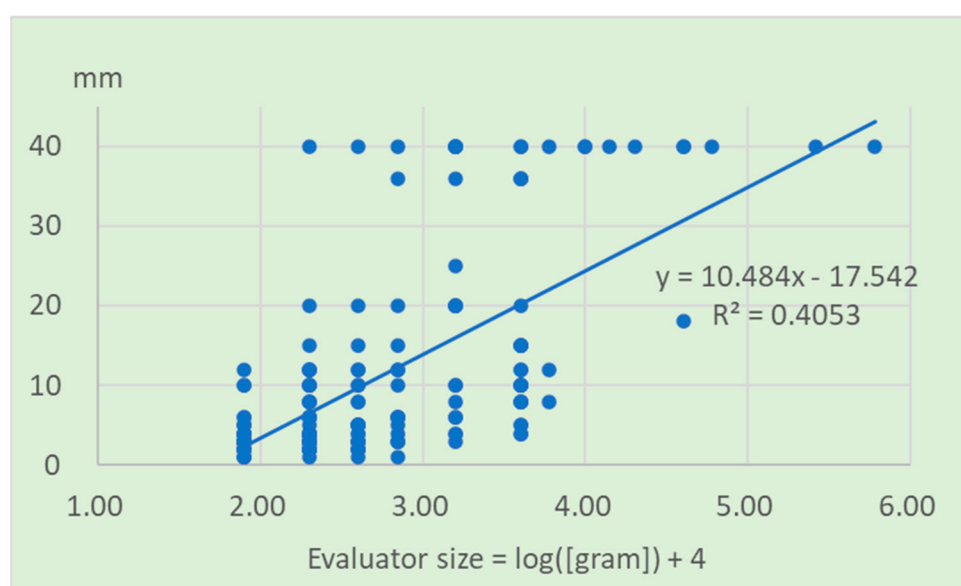

**Figure S19.** Relation between minimal tactile sense and two-point discrimination sense (Lower lip) - Exposed group (n=184).

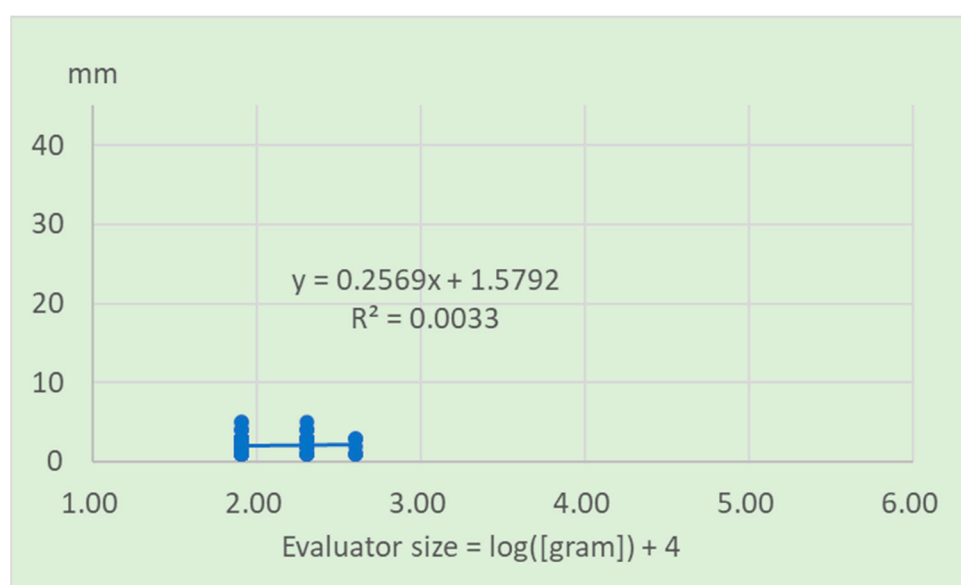

**Figure S20.** Relation between minimal tactile sense and two-point discrimination sense (Lower lip) - Control group (n=128).

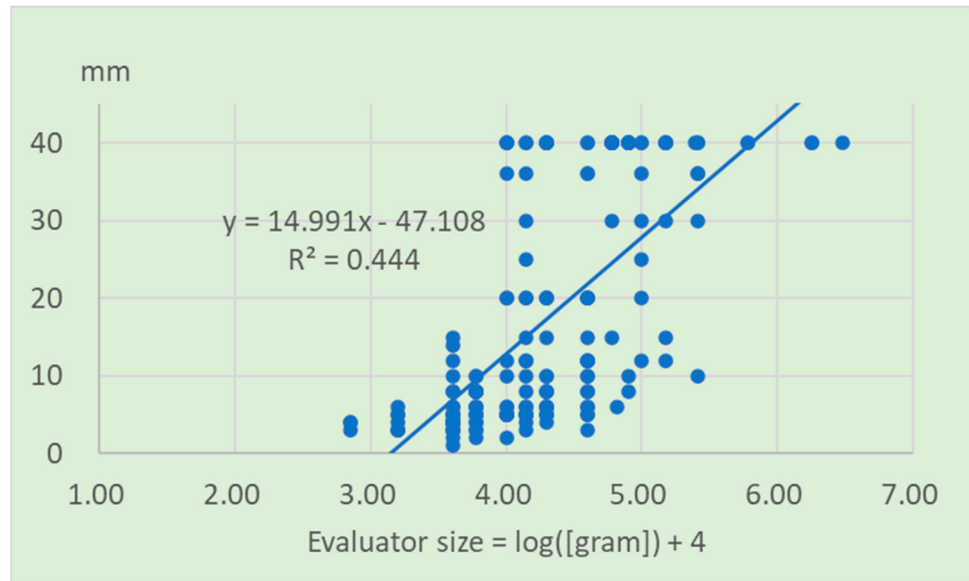

**Figure S21.** Relation between minimal tactile sense and two-point discrimination sense (Right index finger) - Exposed group (n=188).

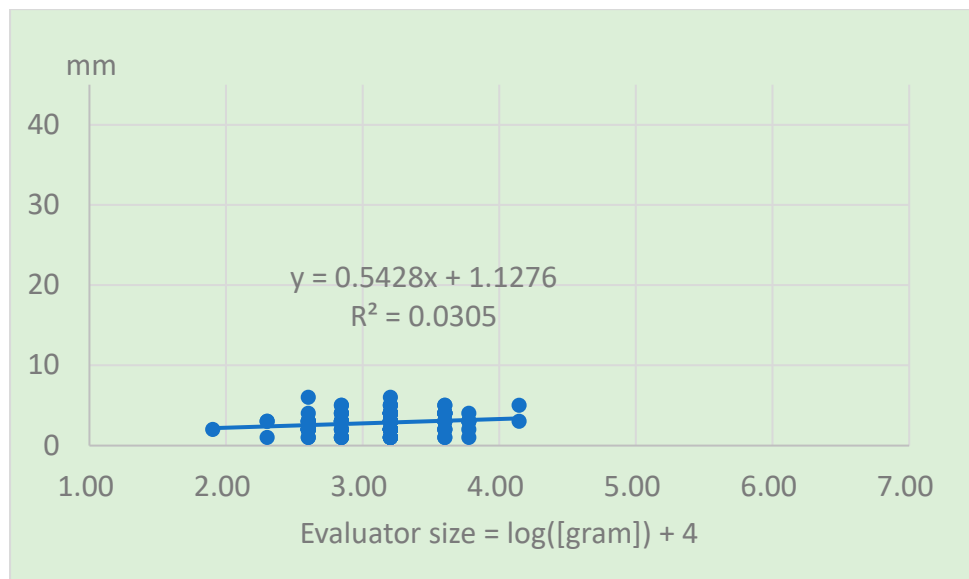

**Figure S22.** Relation between minimal tactile sense and two-point discrimination sense (Right index finger) - Control group (n=126).

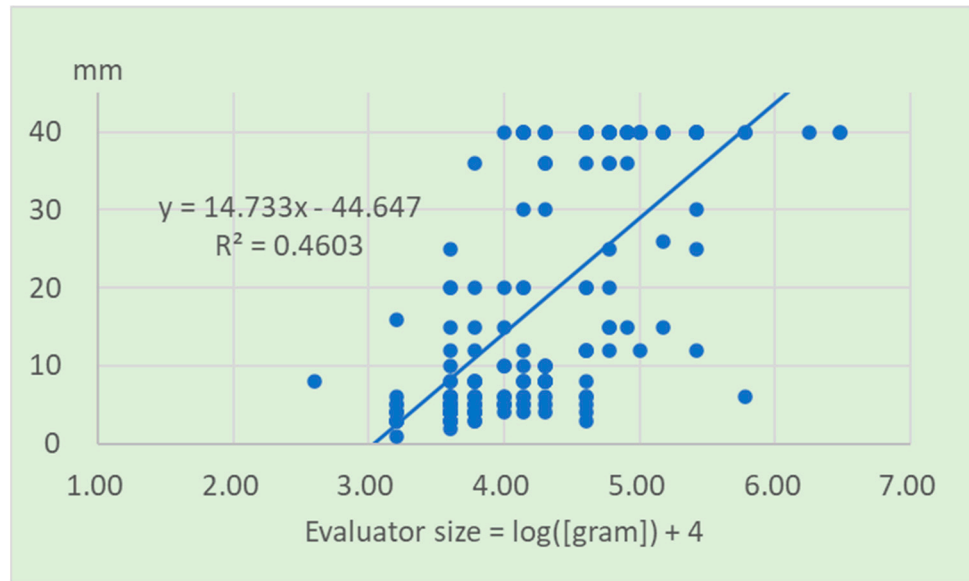

**Figure S23.** Relation between minimal tactile sense and two-point discrimination sense (Left index finger) - Exposed group (n=188).

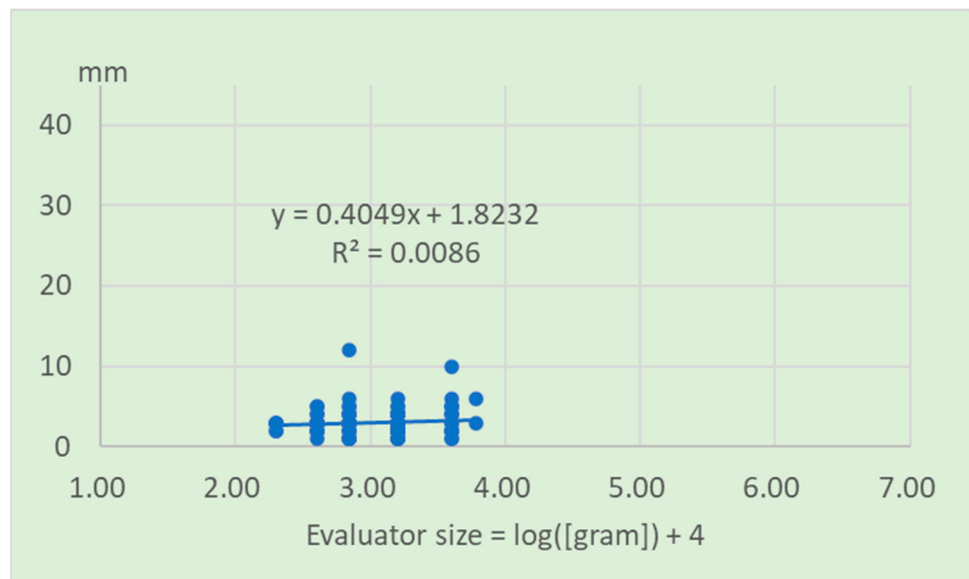

**Figure S24.** Relation between minimal tactile sense and two-point discrimination sense (Left index finger) - Control group (n=127).

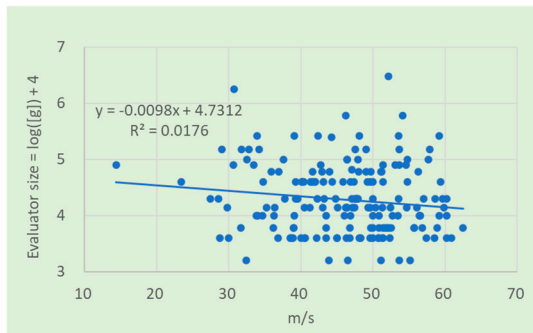

Figure S25. Threshold of minimal tactile sense in right index finger and SCV in right median nerve (n=179)

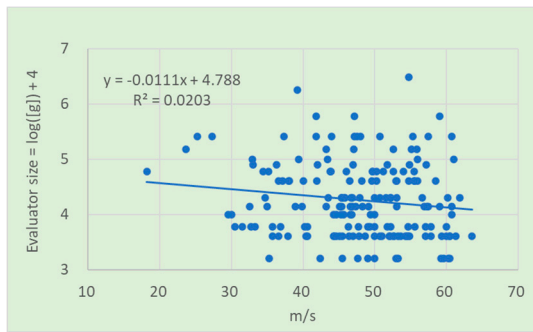

Figure S26. Threshold of minimal tactile sense in left index finger and SCV in left median nerve (n=179)

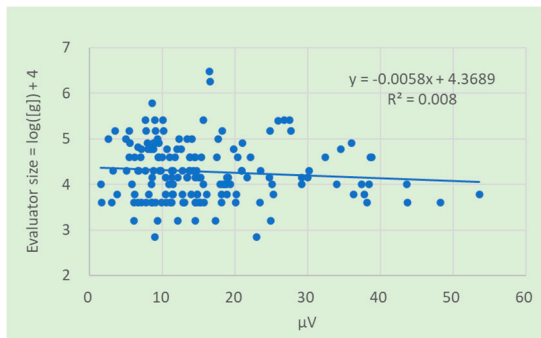

Figure S27. Threshold of minimal tactile sense in right index finger and SCA in right median nerve (n=165)

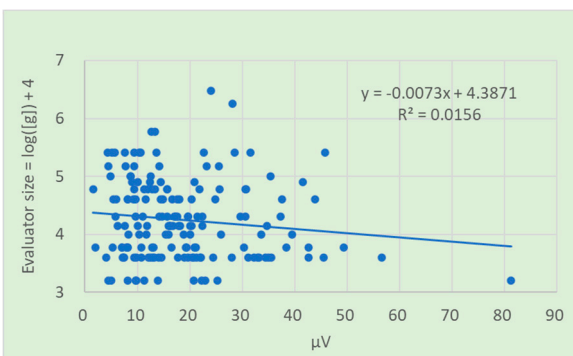

Figure S28. Threshold of minimal tactile sense in left index finger and SCA in left median nerve (n=165)

Table S7. Beta coefficient and 95% confidence interval in multivariate analysis on the data of Figure S25

|               | $\beta$<br>Coefficient | 95% Conf. Interval | p-value |
|---------------|------------------------|--------------------|---------|
| Velocity      | 0.0021                 | (-0.009 to 0.013)  | 0.720   |
| Age           | 0.0189                 | (0.010 to 0.027)   | 0.000   |
| Sex           | -0.1919                | (-0.377 to -0.006) | 0.043   |
| Complications | 0.2065                 | (0.002 to 0.410)   | 0.047   |

Table S8. Beta coefficient and 95% confidence interval in multivariate analysis on the data of Figure S26

|               | $\beta$<br>Coefficient | 95% Conf. Interval | p-value |
|---------------|------------------------|--------------------|---------|
| Velocity      | 0.0035                 | (-0.009 to 0.015)  | 0.584   |
| Age           | 0.0198                 | (0.010 to 0.029)   | 0.000   |
| Sex           | -0.2025                | (-0.399 to -0.005) | 0.044   |
| Complications | 0.2655                 | (0.041 to 0.489)   | 0.021   |

Table S9. Beta coefficient and 95% confidence interval in multivariate analysis on the data of Figure S27

|               | $\beta$ Coefficient | 95% Conf. Interval | p-value |
|---------------|---------------------|--------------------|---------|
| Amplitude     | 0.0027              | (-0.007 to 0.012)  | 0.609   |
| Age           | 0.0204              | (0.010 to 0.030)   | 0.000   |
| Sex           | -0.1537             | (-0.349 to 0.041)  | 0.123   |
| Complications | 0.2265              | (0.029 to 0.423)   | 0.025   |

Table S10. Beta coefficient and 95% confidence interval in multivariate analysis on the data of Figure S28

|               | $\beta$ Coefficient | 95% Conf. Interval | p-value |
|---------------|---------------------|--------------------|---------|
| Amplitude     | 0.0005              | (-0.009 to 0.010)  | 0.991   |
| Age           | 0.2104              | (0.010 to 0.031)   | 0.000   |
| Sex           | -0.1615             | (-0.376 to 0.053)  | 0.140   |
| Complications | 0.2593              | (0.046 to 0.471)   | 0.017   |

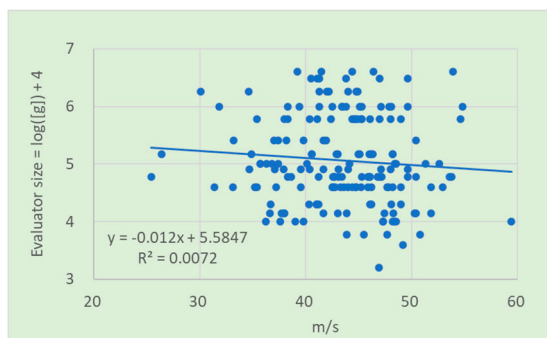

Figure S29. Threshold of minimal tactile sense in right toe and SCV in right sural nerve (n=175)

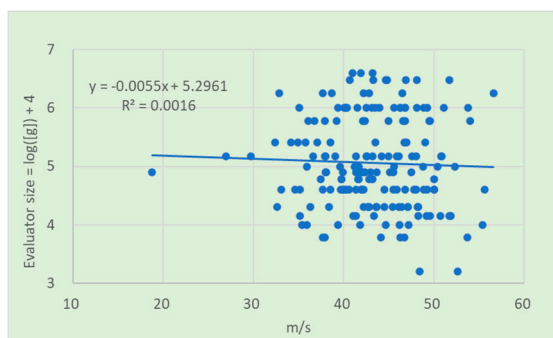

Figure S30. Threshold of minimal tactile sense in left toe and SCV in left sural nerve (n=175)

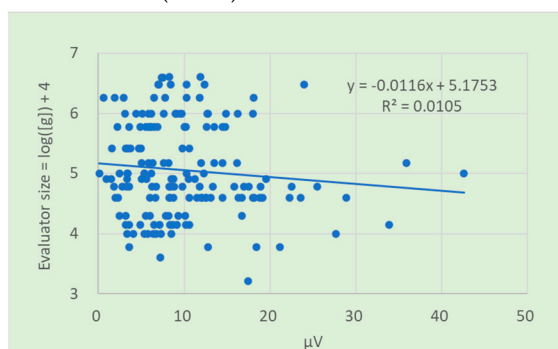

Figure S31. Threshold of minimal tactile sense in right toe and SCA in right sural nerve (n=163)

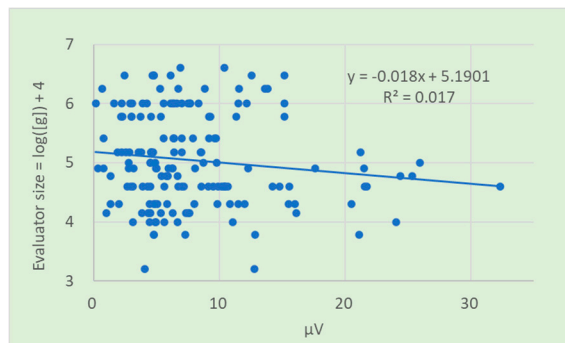

Figure S32. Threshold of minimal tactile sense in left toe and SCA in left sural nerve (n=163)

Table S11. Beta coefficient and 95% confidence interval in multi-variate analysis on the data of Figure S29

|               | $\beta$ Coefficient | 95% Conf. Interval | p-value |
|---------------|---------------------|--------------------|---------|
| Velocity      | -0.0040             | (-0.024 to 0.016)  | 0.710   |
| Age           | 0.0215              | (0.010 to 0.032)   | 0.000   |
| Sex           | -0.2465             | (-0.476 to -0.016) | 0.036   |
| Complications | 0.2844              | (0.046 to 0.522)   | 0.019   |

Table S12. Beta coefficient and 95% confidence interval in multi-variate analysis on the data of Figure S30

|               | $\beta$ Coefficient | 95% Conf. Interval | p-value |
|---------------|---------------------|--------------------|---------|
| Velocity      | -0.0005             | (-0.021 to 0.020)  | 0.961   |
| Age           | 0.0197              | (0.008 to 0.030)   | 0.001   |
| Sex           | -0.2551             | (-0.490 to -0.019) | 0.034   |
| Complications | 0.3490              | (0.108 to 0.589)   | 0.005   |

Table S13. Beta coefficient and 95% confidence interval in multi-variate analysis on the data of Figure S31

|               | $\beta$ Coefficient | 95% Conf. Interval | p-value |
|---------------|---------------------|--------------------|---------|
| Amplitude     | 0.0033              | (-0.014 to 0.021)  | 0.721   |
| Age           | 0.0232              | (0.010 to 0.035)   | 0.000   |
| Sex           | -0.2057             | (-0.446 to -0.035) | 0.094   |
| Complications | 0.3203              | (0.076 to 0.563)   | 0.010   |

Table S14. Beta coefficient and 95% confidence interval in multi-variate analysis on the data of Figure S32

|               | $\beta$ Coefficient | 95% Conf. Interval | p-value |
|---------------|---------------------|--------------------|---------|
| Amplitude     | -0.0047             | (-0.026 to 0.016)  | 0.667   |
| Age           | 0.0193              | (0.006 to 0.031)   | 0.003   |
| Sex           | -0.2524             | (-0.495 to -0.009) | 0.042   |
| Complications | 0.3725              | (0.127 to 0.617)   | 0.003   |

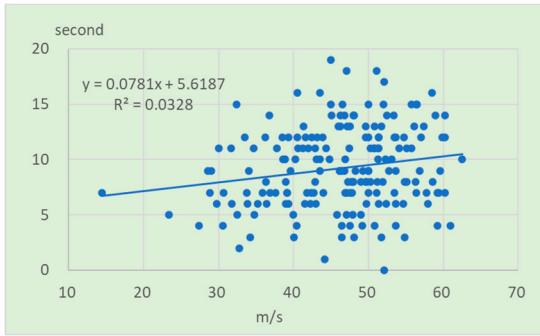

Figure S33. Threshold of vibration sense in right wrist and SCV in right median nerve (n=185)

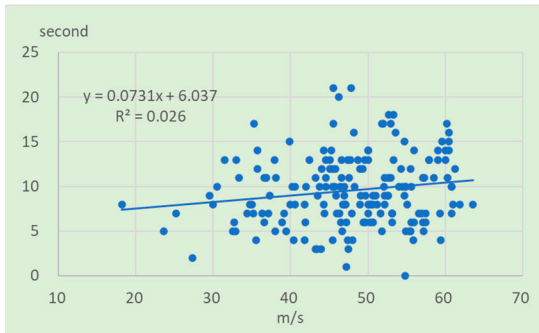

Figure S34. Threshold of vibration sense in left wrist and SCV in left median nerve (n=185)

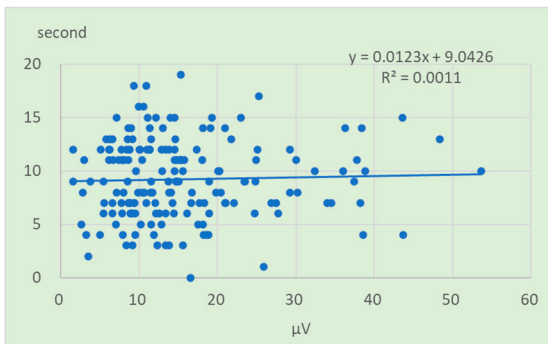

Figure S35. Threshold of vibration sense in right wrist and SCA in right median nerve (n=171)

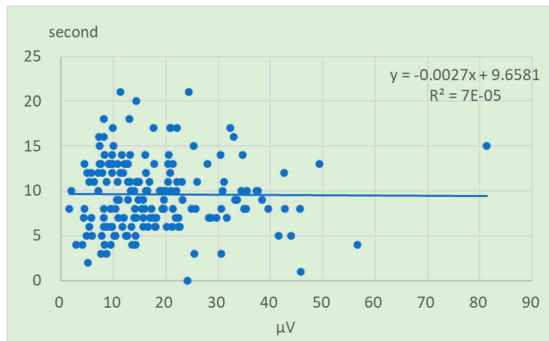

Figure S36. Threshold of vibration sense in left wrist and SCA in left median nerve (n=171)

Table S15. Beta coefficient and 95% confidence interval in multivariate analysis on the data of Figure S33

|               | $\beta$ Coefficient | 95% Conf. Interval | p-value |
|---------------|---------------------|--------------------|---------|
| Velocity      | 0.0335              | (-0.033 to 0.100)  | 0.327   |
| Age           | -0.0724             | (-0.124 to -0.020) | 0.007   |
| Sex           | 0.8622              | (-0.221 to 1.945)  | 0.118   |
| Complications | -0.7628             | (-1.944 to 0.419)  | 0.205   |

Table S16. Beta coefficient and 95% confidence interval in multivariate analysis on the data of Figure S34

|               | $\beta$ Coefficient | 95% Conf. Interval | p-value |
|---------------|---------------------|--------------------|---------|
| Velocity      | 0.0275              | (-0.044 to 0.099)  | 0.455   |
| Age           | -0.0936             | (-0.149 to -0.037) | 0.001   |
| Sex           | 0.8160              | (-0.326 to 1.958)  | 0.160   |
| Complications | -0.4842             | (-1.772 to 0.804)  | 0.459   |

Table S17. Beta coefficient and 95% confidence interval in multivariate analysis on the data of Figure S35

|               | $\beta$ Coefficient | 95% Conf. Interval | p-value |
|---------------|---------------------|--------------------|---------|
| Amplitude     | -0.0175             | (-0.079 to 0.044)  | 0.575   |
| Age           | -0.0709             | (-0.128 to -0.012) | 0.017   |
| Sex           | 1.0360              | (-0.121 to 2.193)  | 0.079   |
| Complications | -1.2193             | (-2.389 to -0.049) | 0.041   |

Table S18. Beta coefficient and 95% confidence interval in multivariate analysis on the data of Figure S36

|               | $\beta$ Coefficient | 95% Conf. Interval | p-value |
|---------------|---------------------|--------------------|---------|
| Amplitude     | -0.0363             | (-0.092 to 0.020)  | 0.206   |
| Age           | -0.1023             | (-0.165 to -0.039) | 0.002   |
| Sex           | 0.7654              | (-0.499 to 2.029)  | 0.234   |
| Complications | -0.9630             | (-2.215 to 0.289)  | 0.131   |

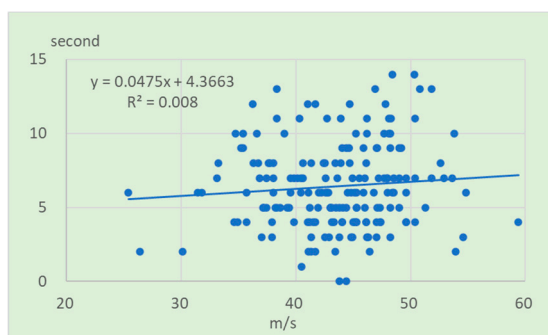

Figure S37. Threshold of vibration sense in right ankle and SCV in right sural nerve (n=179)

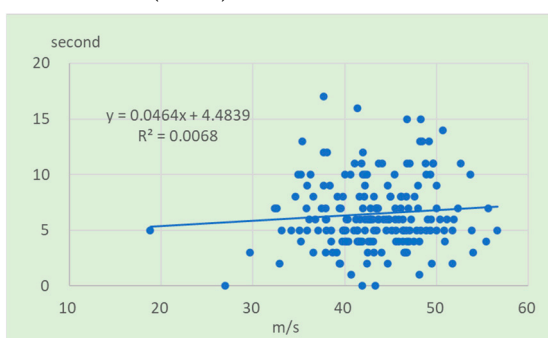

Figure S38. Threshold of vibration sense in left ankle and SCV in left sural nerve (n=180)

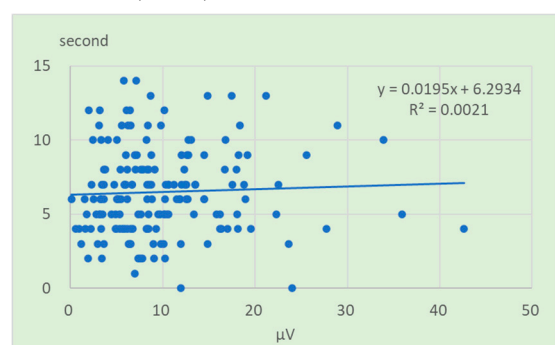

Figure S39. Threshold of vibration sense in right ankle and SCA in right sural nerve (n=167)

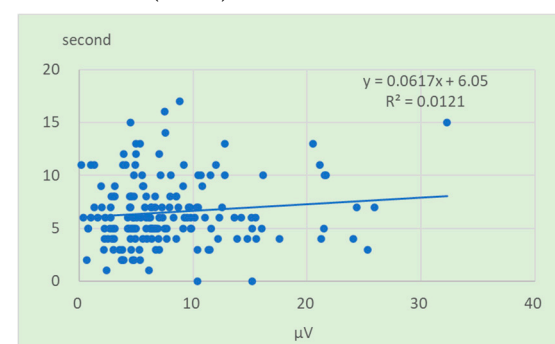

Figure S40. Threshold of vibration sense in left ankle and SCA in left sural nerve (n=167)

Table S19. Beta coefficient and 95% confidence interval in multi-variate analysis on the data of Figure S37

|               | $\beta$ Coefficient | 95% Conf. Interval | p-value |
|---------------|---------------------|--------------------|---------|
| Velocity      | 0.0257              | (-0.051 to 0.102)  | 0.512   |
| Age           | -0.0949             | (-0.135 to -0.054) | 0.000   |
| Sex           | 1.0058              | (0.164 to 1.847)   | 0.019   |
| Complications | -0.6904             | (-1.555 to 0.174)  | 0.117   |

Table S20. Beta coefficient and 95% confidence interval in multi-variate analysis on the data of Figure S38

|               | $\beta$ Coefficient | 95% Conf. Interval | p-value |
|---------------|---------------------|--------------------|---------|
| Velocity      | 0.0355              | (-0.044 to 0.115)  | 0.383   |
| Age           | -0.1191             | (-0.162 to -0.075) | 0.000   |
| Sex           | 0.9899              | (0.077 to 1.902)   | 0.034   |
| Complications | -0.4675             | (-1.394 to 0.459)  | 0.321   |

Table S21. Beta coefficient and 95% confidence interval in multi-variate analysis on the data of Figure S39

|               | $\beta$ Coefficient | 95% Conf. Interval | p-value |
|---------------|---------------------|--------------------|---------|
| Amplitude     | -0.0304             | (-0.096 to 0.036)  | 0.368   |
| Age           | -0.0965             | (-0.142 to -0.050) | 0.000   |
| Sex           | 1.0818              | (0.197 to 1.966)   | 0.017   |
| Complications | -0.8948             | (-1.788 to -0.000) | 0.050   |

Table S22. Beta coefficient and 95% confidence interval in multi-variate analysis on the data of Figure S40

|               | $\beta$ Coefficient | 95% Conf. Interval | p-value |
|---------------|---------------------|--------------------|---------|
| Amplitude     | -0.0002             | (-0.086 to 0.085)  | 0.996   |
| Age           | -0.1129             | (-0.162 to -0.062) | 0.000   |
| Sex           | 1.0901              | (0.135 to 2.045)   | 0.026   |
| Complications | -0.6522             | (-1.612 to 0.307)  | 0.182   |

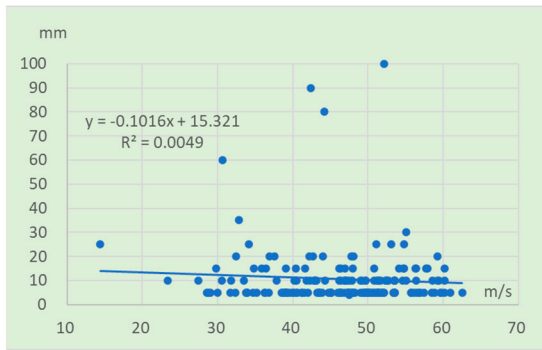

Figure S41. Threshold of upper position sense in right index finger and SCV in right median nerve (n=183)

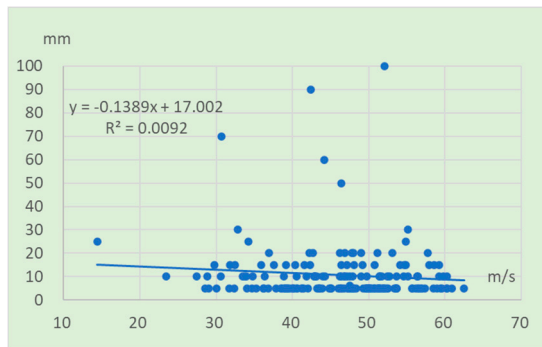

Figure S42. Threshold of lower position sense in left index finger and SCV in left median nerve (n=183)

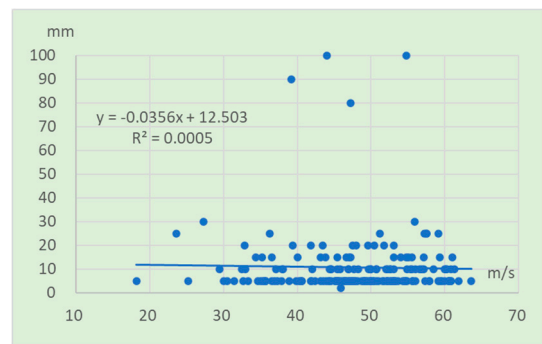

Figure S43. Threshold of upper position sense in left index finger and SCV in left median nerve (n=183)

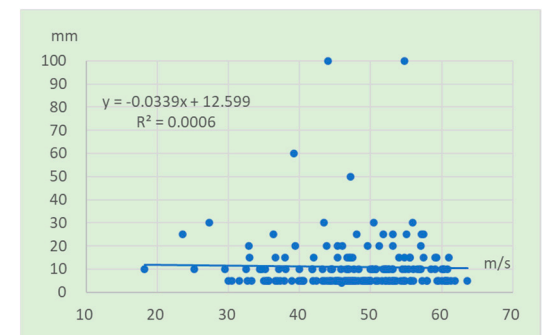

Figure S44. Threshold of lower position sense in left index finger and SCV in left median nerve (n=183)

Table S23. Beta coefficient and 95% confidence interval in multivariate analysis on the data of Figure S41

|               | $\beta$ Coefficient | 95% Conf. Interval | p-value |
|---------------|---------------------|--------------------|---------|
| Velocity      | 0.0557              | (-0.174 to 0.285)  | 0.663   |
| Age           | 0.2141              | (0.035 to 0.393)   | 0.019   |
| Sex           | -4.6799             | (-8.392 to -0.967) | 0.014   |
| Complications | 2.8550              | (-1.216 to 6.926)  | 0.168   |

Table S24. Beta coefficient and 95% confidence interval in multivariate analysis on the data of Figure S42

|               | $\beta$ Coefficient | 95% Conf. Interval | p-value |
|---------------|---------------------|--------------------|---------|
| Velocity      | 0.0102              | (-0.217 to 0.237)  | 0.929   |
| Age           | 0.2408              | (0.063 to 0.417)   | 0.008   |
| Sex           | -5.4755             | (-9.148 to -1.802) | 0.004   |
| Complications | 1.8874              | (-2.140 to 5.915)  | 0.356   |

Table S25. Beta coefficient and 95% confidence interval in multivariate analysis on the data of Figure S43

|               | $\beta$ Coefficient | 95% Conf. Interval | p-value |
|---------------|---------------------|--------------------|---------|
| Velocity      | 0.1464              | (-0.107 to 0.400)  | 0.258   |
| Age           | 0.2706              | (0.073 to 0.467)   | 0.007   |
| Sex           | -5.5235             | (-9.543 to -1.503) | 0.007   |
| Complications | 3.2714              | (-1.284 to 7.827)  | 0.158   |

Table S26. Beta coefficient and 95% confidence interval in multivariate analysis on the data of Figure S44

|               | $\beta$ Coefficient | 95% Conf. Interval | p-value |
|---------------|---------------------|--------------------|---------|
| Velocity      | 0.1387              | (-0.087 to 0.364)  | 0.227   |
| Age           | 0.2645              | (0.089 to 0.439)   | 0.003   |
| Sex           | -5.5939             | (-9.163 to -2.024) | 0.002   |
| Complications | 2.9815              | (-1.064 to 7.027)  | 0.148   |



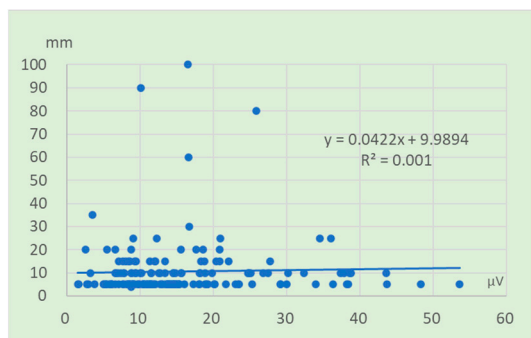

Figure S45. Threshold of upper position sense in right index finger and SCA in right median nerve (n=169)

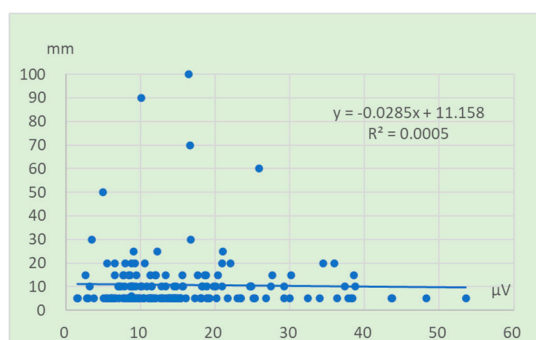

Figure S46. Threshold of lower position sense in right index finger and SCA in right median nerve (n=169)

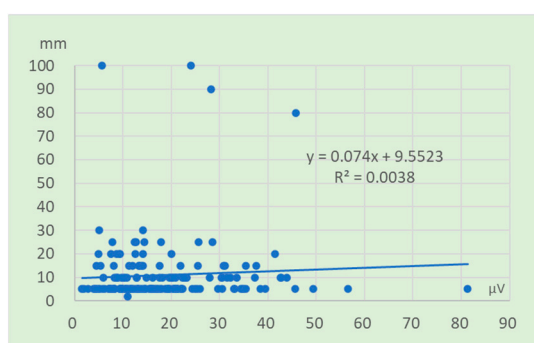

Figure S47. Threshold of upper position sense in left index finger and SCA in left median nerve (n=169)

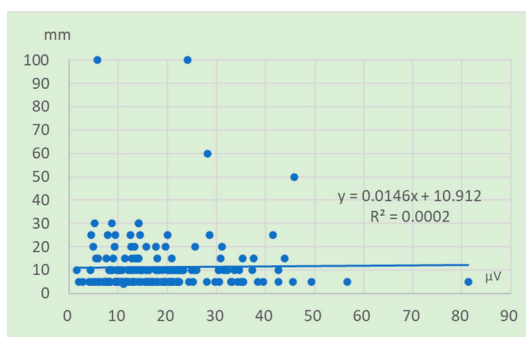

Figure S48. Threshold of lower position sense in left index finger and SCA in left median nerve (n=169)

Table S27. Beta coefficient and 95% confidence interval in multi-variate analysis on the data of Figure S45

|               | $\beta$ Coefficient | 95% Conf. Interval | p-value |
|---------------|---------------------|--------------------|---------|
| Amplitude     | 0.1260              | (-0.087 to 0.339)  | 0.245   |
| Age           | 0.2523              | (0.050 to 0.454)   | 0.015   |
| Sex           | -4.2737             | (-8.298 to -0.249) | 0.038   |
| Complications | 3.1907              | (-0.883 to 7.264)  | 0.124   |

Table S28. Beta coefficient and 95% confidence interval in multi-variate analysis on the data of Figure S46

|               | $\beta$ Coefficient | 95% Conf. Interval | p-value |
|---------------|---------------------|--------------------|---------|
| Amplitude     | 0.0312              | (-0.180 to 0.242)  | 0.772   |
| Age           | 0.2578              | (0.056 to 0.458)   | 0.012   |
| Sex           | -5.4688             | (-9.465 to -1.472) | 0.008   |
| Complications | 2.2571              | (-1.788 to 6.302)  | 0.272   |

Table S29. Beta coefficient and 95% confidence interval in multi-variate analysis on the data of Figure S47

|               | $\beta$ Coefficient | 95% Conf. Interval | p-value |
|---------------|---------------------|--------------------|---------|
| Amplitude     | 0.1572              | (-0.043 to 0.357)  | 0.123   |
| Age           | 0.3215              | (0.096 to 0.546)   | 0.005   |
| Sex           | -4.4471             | (-8.948 to 0.053)  | 0.053   |
| Complications | 3.1740              | (-1.291 to 7.639)  | 0.162   |

Table S30. Beta coefficient and 95% confidence interval in multi-variate analysis on the data of Figure S48

|               | $\beta$ Coefficient | 95% Conf. Interval | p-value |
|---------------|---------------------|--------------------|---------|
| Amplitude     | 0.0752              | (-0.102 to 0.253)  | 0.406   |
| Age           | 0.2931              | (0.093 to 0.492)   | 0.004   |
| Sex           | -5.2218             | (-9.223 to -1.220) | 0.011   |
| Complications | 2.7828              | (-1.187 to 6.753)  | 0.168   |

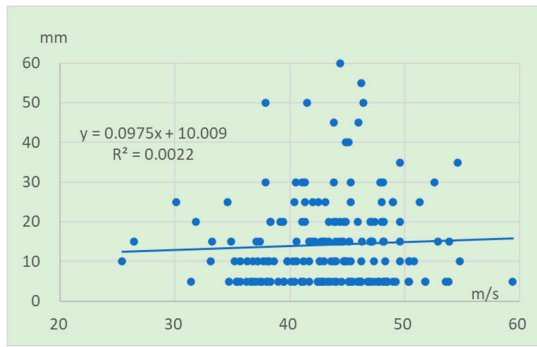

Figure S49. Threshold of upper position sense in right toe and SCV in right sural nerve (n=179)

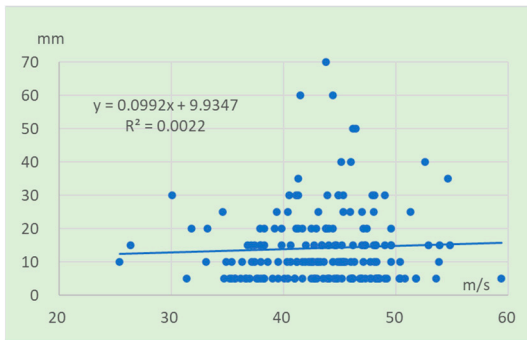

Figure S50. Threshold of lower position sense in right toe and SCV in right sural nerve (n=179)

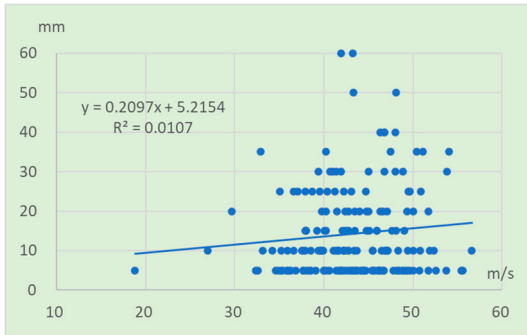

Figure S51. Threshold of upper position sense in left toe and SCV in left sural nerve (n=181)

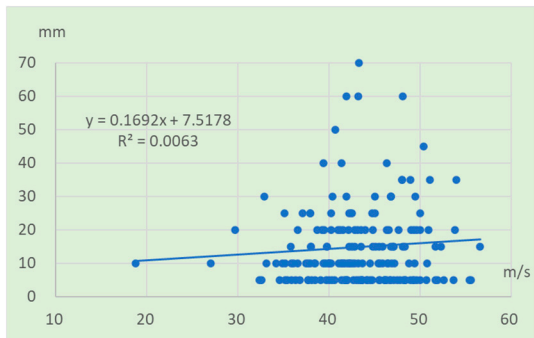

Figure S52. Threshold of lower position sense in left toe and SCV in left sural nerve (n=181)

Table S31. Beta coefficient and 95% confidence interval in multivariate analysis on the data of Figure S49

|               | $\beta$ Coefficient | 95% Conf. Interval | p-value |
|---------------|---------------------|--------------------|---------|
| Amplitude     | 0.1461              | (-0.163 to 0.455)  | 0.353   |
| Age           | 0.3008              | (0.137 to 0.464)   | 0.000   |
| Sex           | -3.2965             | (-6.677 to 0.084)  | 0.056   |
| Complications | 1.3931              | (-2.081 to 4.868)  | 0.430   |

Table S32. Beta coefficient and 95% confidence interval in multivariate analysis on the data of Figure S50

|               | $\beta$ Coefficient | 95% Conf. Interval | p-value |
|---------------|---------------------|--------------------|---------|
| Amplitude     | 0.0910              | (-0.229 to 0.411)  | 0.577   |
| Age           | 0.2179              | (0.048 to 0.387)   | 0.012   |
| Sex           | -4.2582             | (-7.761 to -0.755) | 0.017   |
| Complications | 1.0185              | (-2.582 to 4.619)  | 0.577   |

Table S33. Beta coefficient and 95% confidence interval in multivariate analysis on the data of Figure S51

|               | $\beta$ Coefficient | 95% Conf. Interval | p-value |
|---------------|---------------------|--------------------|---------|
| Amplitude     | 0.1873              | (-0.109 to 0.484)  | 0.215   |
| Age           | 0.3033              | (0.141 to 0.464)   | 0.000   |
| Sex           | -4.8254             | (-8.204 to -1.446) | 0.005   |
| Complications | 1.4106              | (-2.034 to 4.856)  | 0.420   |

Table S34. Beta coefficient and 95% confidence interval in multivariate analysis on the data of Figure S52

|               | $\beta$ Coefficient | 95% Conf. Interval | p-value |
|---------------|---------------------|--------------------|---------|
| Amplitude     | 0.1254              | (-0.192 to 0.443)  | 0.438   |
| Age           | 0.2702              | (0.097 to -0.442)  | 0.002   |
| Sex           | -5.1382             | (-8.752 to -1.523) | 0.006   |
| Complications | 1.0776              | (-2.607 to 4.762)  | 0.565   |

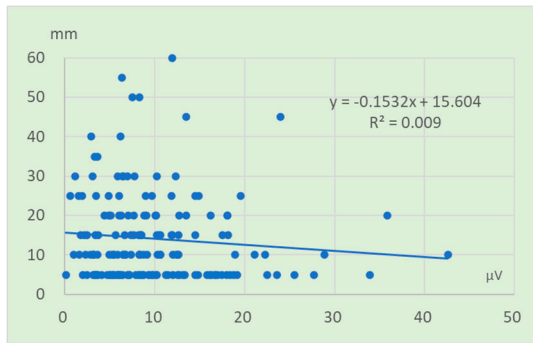

Figure S53. Threshold of upper position sense in right toe and SCA in right sural nerve (n=167)

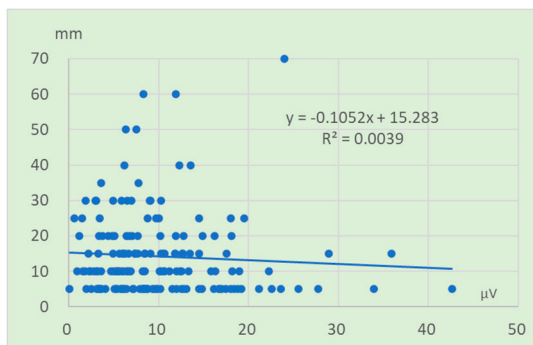

Figure S54. Threshold of lower position sense in right toe and SCA in right sural nerve (n=167)

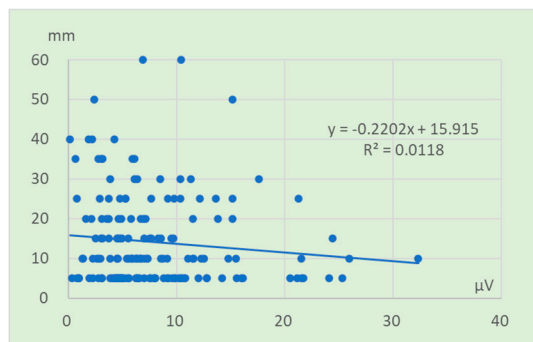

Figure S55. Threshold of upper position sense in left toe and SCA in left sural nerve (n=168)

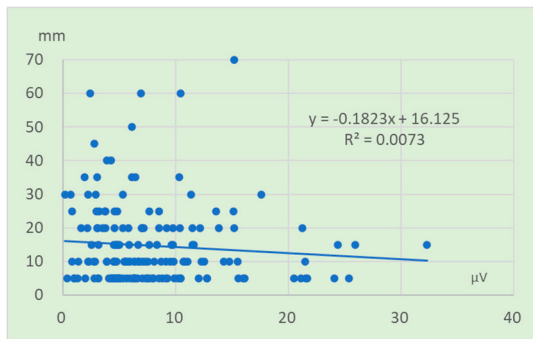

Figure S56. Threshold of lower position sense in left toe and SCA in left sural nerve (n=168)

Table S35. Beta coefficient and 95% confidence interval in multivariate analysis on the data of Figure S53

|               | $\beta$ Coefficient | 95% Conf. Interval | p-value |
|---------------|---------------------|--------------------|---------|
| Amplitude     | -0.0641             | (-0.330 to 0.201)  | 0.635   |
| Age           | 0.2310              | (0.045 to 0.416)   | 0.015   |
| Sex           | -3.4005             | (-6.939 to 0.137)  | 0.060   |
| Complications | 0.9923              | (-2.584 to 4.569)  | 0.585   |

Table S36. Beta coefficient and 95% confidence interval in multivariate analysis on the data of Figure S54

|               | $\beta$ Coefficient | 95% Conf. Interval | p-value |
|---------------|---------------------|--------------------|---------|
| Amplitude     | -0.4650             | (-0.325 to 0.232)  | 0.743   |
| Age           | 0.2063              | (0.012 to -0.400)  | 0.038   |
| Sex           | -4.4357             | (-8.149 to -0.721) | 0.020   |
| Complications | 0.7919              | (-2.962 to 4.546)  | 0.678   |

Table S37. Beta coefficient and 95% confidence interval in multivariate analysis on the data of Figure S55

|               | $\beta$ Coefficient | 95% Conf. Interval | p-value |
|---------------|---------------------|--------------------|---------|
| Amplitude     | -0.1236             | (-0.446 to 0.199)  | 0.451   |
| Age           | 0.2607              | (0.074 to 0.447)   | 0.006   |
| Sex           | -5.0349             | (-8.602 to -1.467) | 0.006   |
| Complications | 0.9088              | (-2.692 to 4.510)  | 0.619   |

Table S38. Beta coefficient and 95% confidence interval in multivariate analysis on the data of Figure S56

|               | $\beta$ Coefficient | 95% Conf. Interval | p-value |
|---------------|---------------------|--------------------|---------|
| Amplitude     | -0.1205             | (-0.465 to 0.224)  | 0.491   |
| Age           | 0.2156              | (-0.016 to -0.414) | 0.034   |
| Sex           | -5.2980             | (-9.106 to -1.488) | 0.007   |
| Complications | 0.7509              | (-3.094 to 4.595)  | 0.586   |

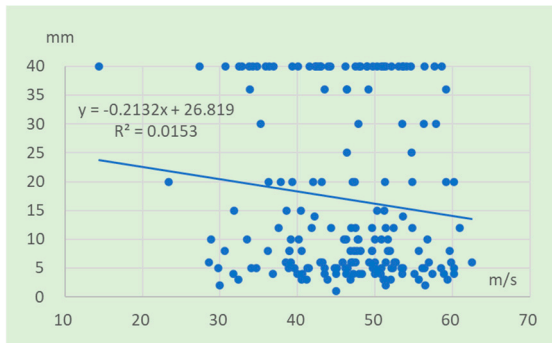

Figure S57. Threshold of two-point discrimination sense in right index finger and SCV in right median nerve (n=182)

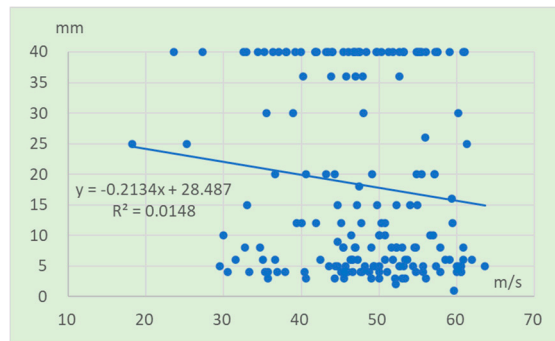

Figure S58. Threshold of two-point discrimination sense in left index finger and SCV in left median nerve (n=182)

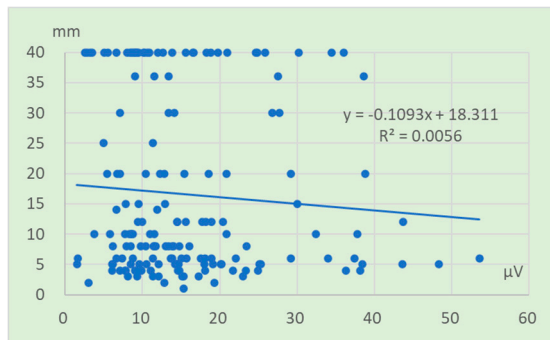

Figure S59. Threshold of two-point discrimination sense in right index finger and SCA in right median nerve (n=168)

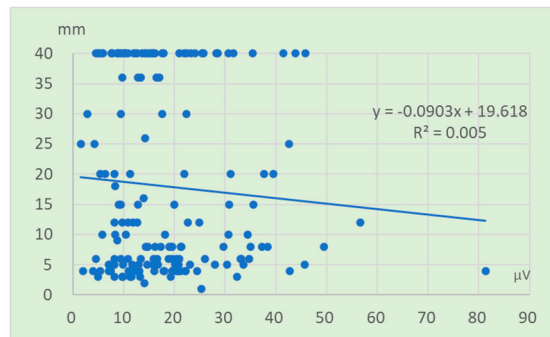

Figure S60. Threshold of two-point discrimination sense in left index finger and SCA in left median nerve (n=168)

Table S39. Beta coefficient and 95% confidence interval in multi-variate analysis on the data of Figure S57

|               | $\beta$ Coefficient | 95% Conf. Interval | p-value |
|---------------|---------------------|--------------------|---------|
| Amplitude     | -0.0279             | (-0.262 to 0.236)  | 0.835   |
| Age           | 0.4754              | (0.270 to 0.680)   | 0.000   |
| Sex           | -3.5775             | (-7.822 to 0.667)  | 0.098   |
| Complications | 1.1543              | (-3.495 to 5.803)  | 0.625   |

Table S40. Beta coefficient and 95% confidence interval in multi-variate analysis on the data of Figure S58

|               | $\beta$ Coefficient | 95% Conf. Interval | p-value |
|---------------|---------------------|--------------------|---------|
| Amplitude     | -0.0264             | (-0.302 to 0.249)  | 0.850   |
| Age           | 0.4828              | (0.266 to 0.698)   | 0.000   |
| Sex           | -4.3877             | (-8.769 to -0.006) | 0.050   |
| Complications | 0.8757              | (-4.072 to 5.823)  | 0.727   |

Table S41. Beta coefficient and 95% confidence interval in multi-variate analysis on the data of Figure S59

|               | $\beta$ Coefficient | 95% Conf. Interval | p-value |
|---------------|---------------------|--------------------|---------|
| Amplitude     | 0.0083              | (-0.226 to 0.243)  | 0.944   |
| Age           | 0.4341              | (0.208 to 0.659)   | 0.000   |
| Sex           | -3.7259             | (-8.179 to 0.727)  | 0.100   |
| Complications | 1.0941              | (-3.399 to 5.588)  | 0.631   |

Table S42. Beta coefficient and 95% confidence interval in multi-variate analysis on the data of Figure S60

|               | $\beta$ Coefficient | 95% Conf. Interval | p-value |
|---------------|---------------------|--------------------|---------|
| Amplitude     | -0.0024             | (-0.214 to 0.209)  | 0.983   |
| Age           | 0.4435              | (0.202 to 0.684)   | 0.000   |
| Sex           | -4.7731             | (-9.553 to 0.007)  | 0.050   |
| Complications | 1.0460              | (-3.679 to 5.771)  | 0.663   |
